# Supplementary material for: Canadian and Alaskan wildfire smoke particle properties, their evolution, and controlling factors, from satellite observations
Source: Copernicus journal article supplement (doi:10.5194/acp-22-10267-2022), 2022-08-11
Supplement: Supplementary file 1 [file acp-22-10267-2022-supplement.pdf]

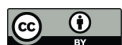

*Supplement of*

## **Canadian and Alaskan wildfire smoke particle properties, their evolution, and controlling factors, from satellite observations**

**Katherine T. Junghenn Noyes et al.**

*Correspondence to:* Katherine T. Junghenn Noyes ([katherine.t.junghenn@nasa.gov](mailto:katherine.t.junghenn@nasa.gov))

The copyright of individual parts of the supplement might differ from the article licence.

**Table S1.** Supplementary information on the MISR components from Research Aerosol (RA) retrieval results, using the algorithm version summarized in Sect. 2.1 in the main text, with a 774-mixture climatology.

| Particle Size, Shape,<br>Light-Absorption <sup>a</sup>    | Imaginary Refractive Index<br>( $\times 10^2$ ) <sup>b</sup> |       |       |       | Real Refractive Index <sup>b</sup> |       |       |       | $r_0$ <sup>c</sup> | $r_e$ <sup>c</sup> | $r_1$ <sup>c</sup> | $\sigma$ <sup>c</sup> |
|-----------------------------------------------------------|--------------------------------------------------------------|-------|-------|-------|------------------------------------|-------|-------|-------|--------------------|--------------------|--------------------|-----------------------|
|                                                           | 446                                                          | 558   | 672   | 866   | 446                                | 558   | 672   | 866   |                    |                    |                    |                       |
| Very small,<br>spherical, strongly<br>absorbing (flat)    | 2.19                                                         | 2.19  | 2.19  | 2.19  | 1.6                                | 1.6   | 1.6   | 1.6   | 0.001              | 0.06               | 0.40               | 0.28                  |
| Very small,<br>spherical, strongly<br>absorbing (steep)   | 3.07                                                         | 1.80  | 1.04  | 0.930 | 1.55                               | 1.55  | 1.55  | 1.55  | 0.001              | 0.06               | 0.40               | 0.28                  |
| Very small,<br>spherical, moderately<br>absorbing (flat)  | 0.693                                                        | 0.693 | 0.693 | 0.693 | 1.5                                | 1.5   | 1.5   | 1.5   | 0.001              | 0.06               | 0.40               | 0.28                  |
| Very small,<br>spherical, moderately<br>absorbing (steep) | 1.03                                                         | 0.608 | 0.429 | 0.31  | 1.475                              | 1.475 | 1.475 | 1.475 | 0.001              | 0.06               | 0.40               | 0.28                  |
| Small, spherical,<br>strongly absorbing<br>(flat)         | 4.66                                                         | 4.66  | 4.66  | 4.66  | 1.6                                | 1.6   | 1.6   | 1.6   | 0.001              | 0.12               | 0.75               | 0.32                  |
| Small, spherical,<br>strongly absorbing<br>(steep)        | 6.99                                                         | 4.11  | 2.23  | 2.11  | 1.55                               | 1.55  | 1.55  | 1.55  | 0.001              | 0.12               | 0.75               | 0.32                  |
| Small, spherical,<br>moderately absorbing<br>(flat)       | 1.69                                                         | 1.69  | 1.69  | 1.69  | 1.5                                | 1.5   | 1.5   | 1.5   | 0.001              | 0.12               | 0.75               | 0.32                  |
| Small, spherical,<br>moderately absorbing<br>(steep)      | 2.62                                                         | 1.54  | 0.910 | 0.794 | 1.475                              | 1.475 | 1.475 | 1.475 | 0.001              | 0.12               | 0.75               | 0.32                  |
| Medium, spherical,<br>strongly absorbing<br>(flat)        | 4.58                                                         | 4.58  | 4.58  | 4.58  | 1.6                                | 1.6   | 1.6   | 1.6   | 0.001              | 0.26               | 1.5                | 0.35                  |
| Medium, spherical,<br>strongly absorbing<br>(steep)       | 7.41                                                         | 4.36  | 2.36  | 2.24  | 1.55                               | 1.55  | 1.55  | 1.55  | 0.001              | 0.26               | 1.5                | 0.35                  |
| Medium, spherical,<br>moderately absorbing<br>(flat)      | 1.85                                                         | 1.85  | 1.85  | 1.85  | 1.5                                | 1.5   | 1.5   | 1.5   | 0.001              | 0.26               | 1.5                | 0.35                  |
| Medium, spherical,<br>moderately absorbing<br>(steep)     | 3.00                                                         | 1.76  | 1.02  | 0.911 | 1.475                              | 1.475 | 1.475 | 1.475 | 0.001              | 0.26               | 1.5                | 0.35                  |
| Very small,<br>spherical, non-<br>absorbing               | 0                                                            | 0     | 0     | 0     | 1.4                                | 1.4   | 1.4   | 1.4   | 0.001              | 0.06               | 0.40               | 0.28                  |
| Small, spherical,<br>non-absorbing                        | 0                                                            | 0     | 0     | 0     | 1.4                                | 1.4   | 1.4   | 1.4   | 0.001              | 0.12               | 0.75               | 0.32                  |

|                                        |       |       |       |       |       |       |       |       |       |      |     |      |
|----------------------------------------|-------|-------|-------|-------|-------|-------|-------|-------|-------|------|-----|------|
| Medium, spherical, non-absorbing       | 0     | 0     | 0     | 0     | 1.4   | 1.4   | 1.4   | 1.4   | 0.001 | 0.28 | 1.5 | 0.35 |
| Large, spherical, non-absorbing        | 0     | 0     | 0     | 0     | 1.4   | 1.4   | 1.4   | 1.4   | 0.1   | 1.28 | 10  | 0.45 |
| Large, non-spherical, weakly absorbing | 0.219 | 0.209 | 0.198 | 0.180 | 1.542 | 1.537 | 1.532 | 1.524 | N/A   | 1.21 | N/A | N/A  |

<sup>a</sup> Particle type includes four elements: size—very small (VSm), small (Sm), medium (Me), and large (La); shape—spherical (Sph) or non-spherical (Nsph); light-absorption—non-absorbing (Nab), weakly absorbing (Wab), moderately absorbing (Mab), and strongly absorbing (Sab); spectral light-absorption profile—equal in all spectral bands (flat), or varying between spectral bands (steep).

<sup>b</sup> Refractive indices are given across all four spectral bands ( $\mu\text{m}$ )

<sup>c</sup> Each spherical component has a designated effective radius ( $r_e$ ), ranging between a minimum ( $r_0$ ) and maximum ( $r_1$ ) particle size. Particle size is normally distributed within these bounds with variance  $\sigma$ . Particle size is given in  $\mu\text{m}$ .

**Table S2.** Land cover type legend for the MODIS International Geosphere-Biosphere Programme (IGBP) classification method (\* = observed in this study and can be found in Table 3 in the main text)

| <b>Land Cover Type</b>              | <b>Description</b>                                                                                     |
|-------------------------------------|--------------------------------------------------------------------------------------------------------|
| Evergreen Needleleaf Forests *      | Dominated by evergreen conifer trees (canopy >2m). Tree cover >60%.                                    |
| Evergreen Broadleaf Forests *       | Dominated by evergreen broadleaf and palmate trees (canopy >2m). Tree cover >60%.                      |
| Deciduous Needleleaf Forests *      | Dominated by deciduous needleleaf (larch) trees (canopy >2m). Tree cover >60%.                         |
| Deciduous Broadleaf Forests *       | Dominated by deciduous broadleaf trees (canopy >2m). Tree cover >60%.                                  |
| Mixed Forests *                     | Dominated by neither deciduous nor evergreen (40-60% of each) tree type (canopy >2m). Tree cover >60%. |
| Closed Shrublands                   | Dominated by woody perennials (1-2m height) >60% cover.                                                |
| Open Shrublands *                   | Dominated by woody perennials (1-2m height) 10-60% cover.                                              |
| Woody Savannas *                    | Tree cover 30-60% (canopy >2m).                                                                        |
| Savannas *                          | Tree cover 10-30% (canopy >2m).                                                                        |
| Grasslands *                        | Dominated by herbaceous annuals (<2m).                                                                 |
| Permanent Wetlands                  | Permanently inundated lands with 30-60% water cover and >10% vegetated cover.                          |
| Croplands                           | At least 60% of area is cultivated cropland.                                                           |
| Urban and Built-up Lands            | At least 30% impervious surface area including building materials, asphalt, and vehicles.              |
| Cropland/Natural Vegetation Mosaics | Mosaics of small-scale cultivation 40-60% with natural tree, shrub, or herbaceous vegetation.          |
| Permanent Snow and Ice              | At least 60% of area is covered by snow and ice for at least 10 months of the year.                    |
| Barren                              | At least 60% of area is non-vegetated barren (sand, rock, soil) areas with less than 10% vegetation.   |
| Water Bodies                        | At least 60% of area is covered by permanent water bodies                                              |

**Table S3.** Land cover type legend for the FAO-Land Cover Classification System (LCCS) surface hydrology classification method.

| <b>Land Cover Type</b> | <b>Description</b>                                                                                                   |
|------------------------|----------------------------------------------------------------------------------------------------------------------|
| Dense Forests          | Tree cover >60% (canopy >2m).                                                                                        |
| Open Forests           | Tree cover 10-60% (canopy >2m).                                                                                      |
| Shrublands             | Shrub cover >60% (1-2m).                                                                                             |
| Grasslands             | Dominated by herbaceous annuals (<2m) >10% cover.                                                                    |
| Woody Wetlands         | Shrub and tree cover (>1m) >10% cover. Permanently or seasonally inundated.                                          |
| Herbaceous Wetlands    | Dominated by herbaceous annuals (<2m) >10% cover. Permanently or seasonally inundated.                               |
| Tundra                 | Tree cover <10%. Snow-covered for at least 8 months of the year.                                                     |
| Permanent Snow and Ice | At least 60% of area is covered by snow and ice for at least 10 months of the year.                                  |
| Barren                 | At least 60% of area is non-vegetated barren (sand, rock, soil) or permanent snow/ice with less than 10% vegetation. |
| Water Bodies           | At least 60% of area is covered by permanent water bodies.                                                           |

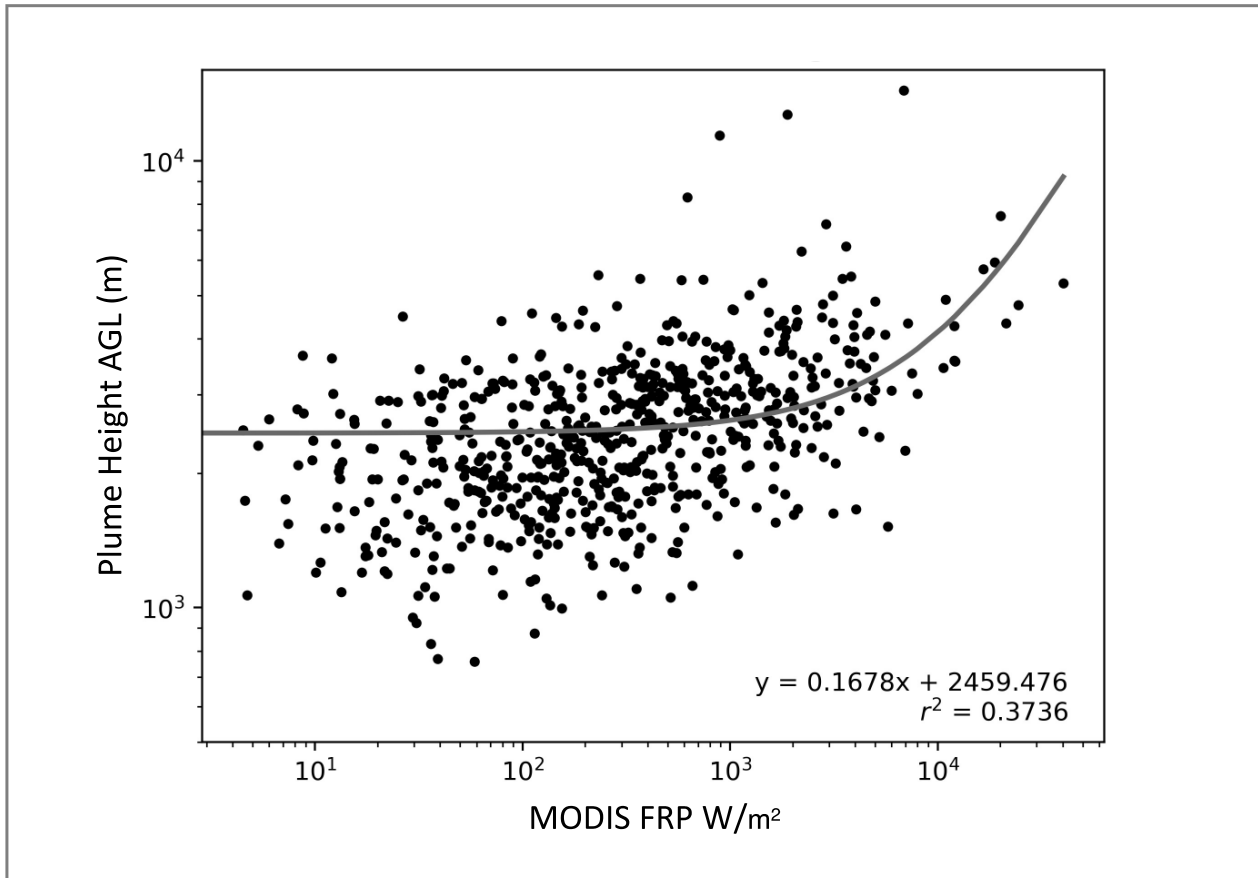

**Figure S1.** MISR-MINX maximum plume stereo heights vs. cumulative plume FRP from MODIS.

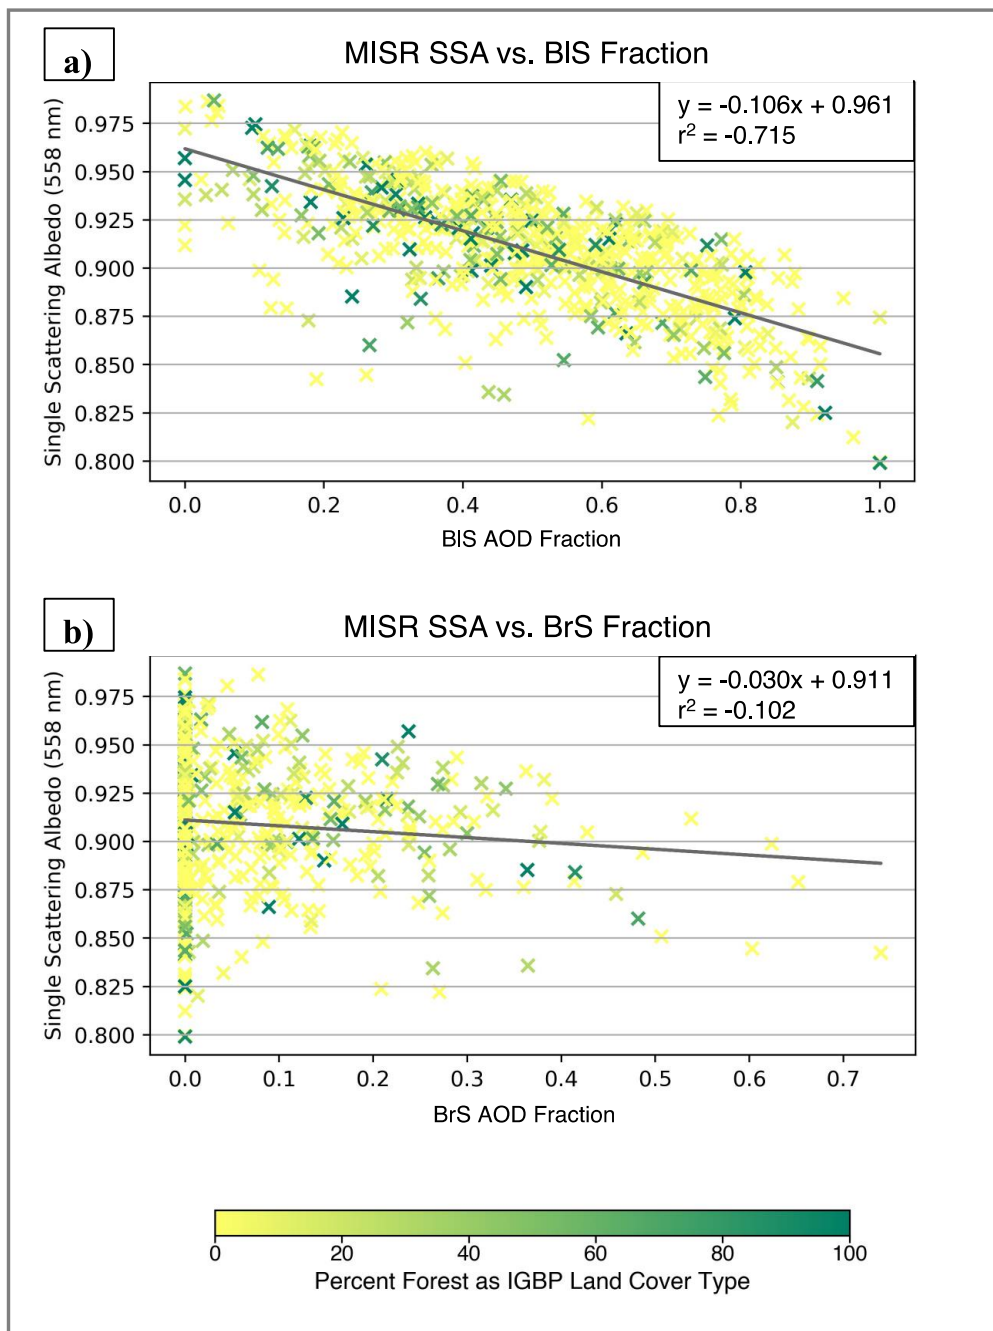

**Figure S2.** Relationship between MISR SSA and the interpreted amount of (a) black smoke (BIS) and (b) brown smoke (BrS).
